# Supplementary material for: Claudin-2 inhibits renal clear cell carcinoma progression by inhibiting YAP-activation
Source: PubMed Central journal article supplement (PMC7901196; doi:10.1186/s13046-021-01870-5), 2021-02-23

Fig.S 2

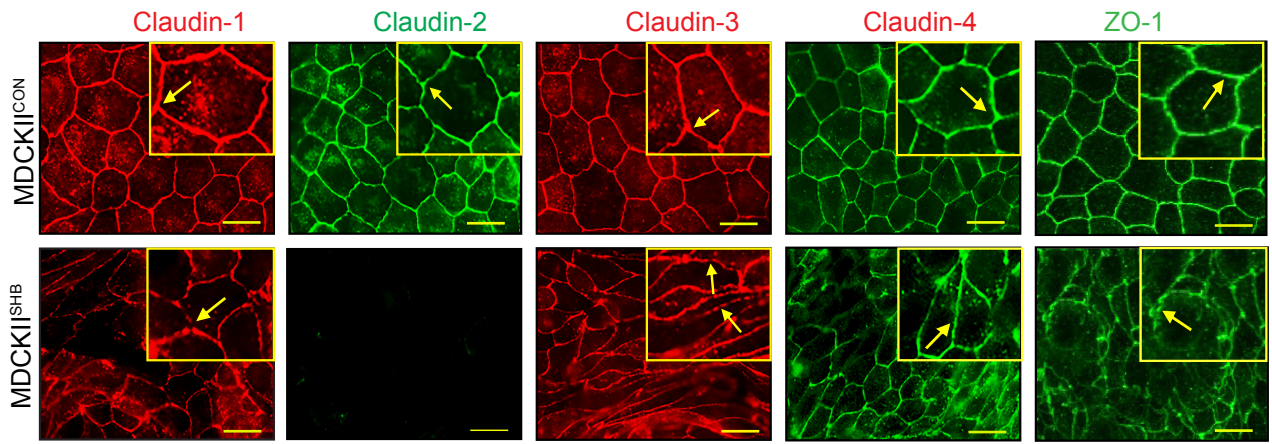

Supplement: 13046_2021_1870_MOESM3_ESM.pdf [file 13046_2021_1870_MOESM3_ESM.pdf]
