# Supplementary material for: Claudin-2 inhibits renal clear cell carcinoma progression by inhibiting YAP-activation
Source: PubMed Central journal article supplement (PMC7901196; doi:10.1186/s13046-021-01870-5), 2021-02-23

Fig.S 6

a.

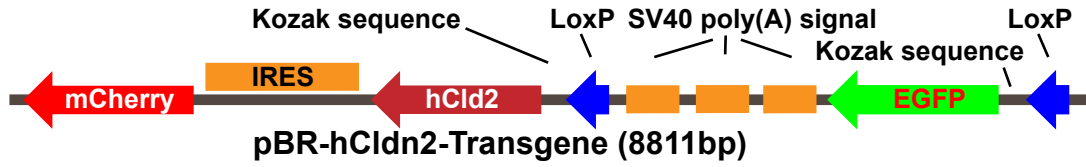

pBR-hclaudin2 m-cheery plasmid → GFP expression

pBR-hclaudin2 m-cheery plasmid+pCMV Cre → m-Cherry expression + Claudin-2

b. pBR-hclaudin-2

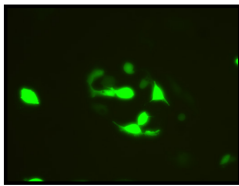

c. pBR-hclaudin-2+pCMV Cre

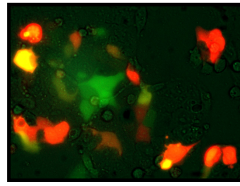

d. pBR-hclaudin-2 - + - +  
pCMV Cre - - + +

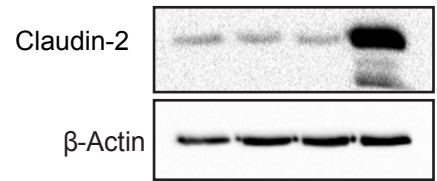

e.

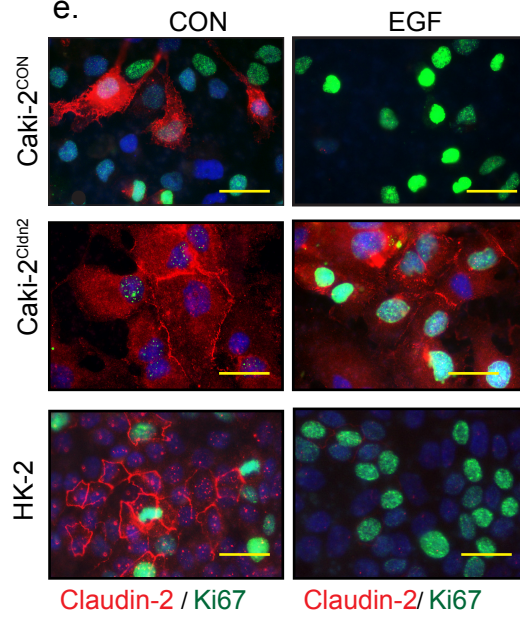

f. Colony formation

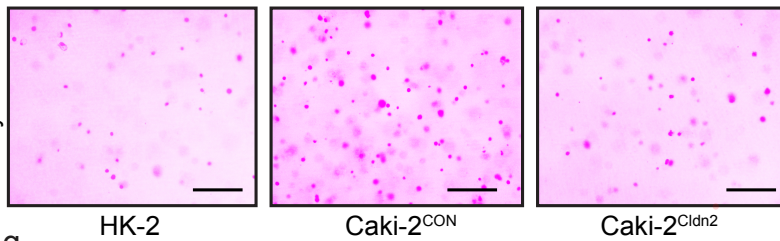

g. Invasion

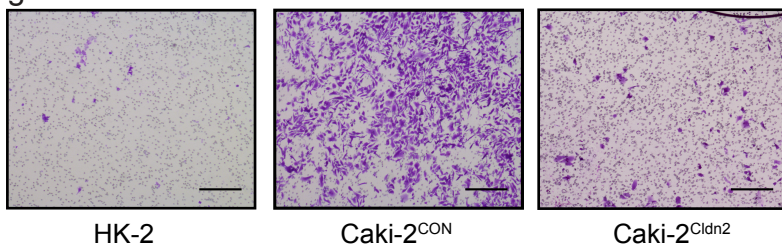

Supplement: 13046_2021_1870_MOESM7_ESM.pdf [file 13046_2021_1870_MOESM7_ESM.pdf]
